# Supplementary material for: Chromatin poises miRNA- and protein-coding genes for expression
Source: HighWire-hosted journal article supplement (doi:10.1101/gr.090951.109), 2009-08-27

## Supplementary Information

### Chromatin Poises miRNA- and Protein-coding Genes for Expression

Artem Barski<sup>1,\*</sup>, Raja Jothi<sup>1,2,\*</sup>, Suresh Cuddapah<sup>1,\*</sup>, Kairong Cui<sup>1</sup>, Tae-Young Roh<sup>1,3</sup>, Dustin E. Schones<sup>1</sup> and Keji Zhao<sup>1,#</sup>

<sup>1</sup> *Laboratory of Molecular Immunology, National Heart, Lung, and Blood Institute, National Institutes of Health, Bethesda, MD 20892, USA*

<sup>2</sup> *Current Address: Biostatistics Branch, National Institute of Environmental Health Sciences, National Institutes of Health, Research Triangle Park, NC 27709, USA*

<sup>3</sup> *Current Address: Dept. of Life Science, Pohang University of Science and Technology (POSTECH) San 31 Hyojadong, Pohang 790-784 Rep. of Korea*

*\* These authors contributed equally to this work*

*# Corresponding author*

#### Contact Information

Keji Zhao  
LMI, NHLBI, NIH  
Bldg 10; Room 7B05  
9000 Rockville Pike  
Bethesda, MD 20892  
Phone: 301 496 2098  
Fax: 301 480 0961  
Email: [zhaok@nhlbi.nih.gov](mailto:zhaok@nhlbi.nih.gov)

## Contents

|                                     |           |
|-------------------------------------|-----------|
| <i>Supplementary Tables</i>         | <u>3</u>  |
| <i>Supplementary Figure Legends</i> | <u>8</u>  |
| <i>Supplementary Figures</i>        | <u>12</u> |

## Supplementary Tables

Table S1. Summary of ChIP-Seq datasets.

| Cell state       | Protein | Residue | Modification | Mapped reads | Start <sup>a</sup> | End <sup>a</sup> | Threshold <sup>b</sup> | Antibody  |
|------------------|---------|---------|--------------|--------------|--------------------|------------------|------------------------|-----------|
| <b>Resting</b>   | H2A.Z   |         |              | 7.5E+06      | -500               | 0                | 8                      | ab4174    |
|                  | H2A     | K5      | ac           | 6.8E+06      |                    |                  |                        | ab1764    |
|                  | H2A     | K9      | ac           | 2.1E+06      |                    |                  |                        | Up07-289  |
|                  | H2B     | K5      | ac           | 3.3E+06      |                    |                  |                        | ab40886   |
|                  | H2B     | K5      | me1          | 8.9E+06      |                    |                  |                        | ab12929   |
|                  | H2B     | K12     | ac           | 3.6E+06      |                    |                  |                        | ab40883   |
|                  | H2B     | K20     | ac           | 4.1E+06      |                    |                  |                        | Up07-347  |
|                  |         | K12     |              |              |                    |                  |                        |           |
|                  | H2B     | 0       | ac           | 3.4E+06      |                    |                  |                        | Up07-564  |
|                  | H3      | K4      | ac           | 3.5E+06      |                    |                  |                        | Up07-539  |
|                  | H3      | K4      | me1          | 1.1E+07      | 500                | 1500             |                        | ab8895    |
|                  | H3      | K4      | me2          | 5.4E+06      |                    |                  |                        | ab7766    |
|                  | H3      | K4      | me3          | 1.7E+07      | 0                  | 500              | 11                     | ab8580    |
|                  | H3      | K9      | ac           | 4.0E+06      |                    |                  |                        | ab4441    |
|                  | H3      | K9      | me1          | 9.3E+06      | 0                  | 1000             |                        | ab8896    |
|                  | H3      | K14     | ac           | 6.5E+06      |                    |                  |                        | Up07-353  |
|                  | H3      | K18     | ac           | 4.2E+06      |                    |                  |                        | ab1191    |
|                  | H3      | K23     | ac           | 6.5E+06      |                    |                  |                        | Up07-355  |
|                  | H3      | K27     | ac           | 3.4E+06      |                    |                  |                        | ab4729    |
|                  | H3      | K27     | me1          | 1.0E+07      | 0                  | TES              |                        | Up07-448  |
|                  | H3      | K27     | me2          | 9.1E+06      |                    |                  |                        | ab24684   |
|                  | H3      | K27     | me3          | 1.8E+07      | 0                  | TES              |                        | Up07-449  |
|                  | H3      | K36     | ac           | 4.4E+06      |                    |                  |                        | Up07-540  |
|                  | H3      | K36     | me3          | 1.4E+07      | 0                  | TES              |                        | ab9050    |
|                  | H3      | K79     | me2          | 4.7E+06      | 0                  | TES              |                        | ab3594    |
|                  | H4      | K5      | ac           | 4.1E+06      |                    |                  |                        | Up07-327  |
|                  | H4      | K8      | ac           | 4.3E+06      |                    |                  |                        | Up07-328  |
|                  | H4      | K12     | ac           | 5.5E+06      |                    |                  |                        | Up07-595  |
|                  | H4      | K16     | ac           | 7.1E+06      |                    |                  |                        | sc-8662R  |
|                  | H4      | K20     | me1          | 1.1E+07      | 0                  | TES              |                        | ab9051    |
|                  | H4      | K91     | ac           | 3.2E+06      |                    |                  |                        | ab4627    |
|                  | Pol II  |         |              | 1.1E+07      | -250               | 250              | 9                      | ab5408    |
| <b>Activated</b> | H2A.Z   |         |              | 3.8E+06      | -500               | 0                | 6                      | see above |
|                  | H3      | K4      | me1          | 4.0E+06      | 500                | 1500             |                        | see above |
|                  | H3      | K4      | me3          | 3.4E+06      | 0                  | 500              | 5                      | see above |
|                  | H3      | K9      | me1          | 7.1E+06      | 0                  | 1000             |                        | see above |
|                  | H3      | K27     | me1          | 4.3E+06      | 0                  | TES              |                        | see above |
|                  | H3      | K27     | me3          | 7.4E+06      | 0                  | TES              |                        | see above |
|                  | H3      | K36     | me3          | 4.5E+06      | 0                  | TES              |                        | see above |
|                  | H3      | K79     | me2          | 5.6E+06      | 0                  | TES              |                        | see above |
|                  | H4      | K20     | me1          | 3.7E+06      | 0                  | TES              |                        | see above |
|                  | Pol II  |         |              | 8.6E+06      | -250               | 250              | 8                      | see above |

<sup>a</sup> Start and end values represent the start and end positions of region of interest with maximal difference in the enrichment of modification between the constitutively expressed (E→E) and constitutively silent (S→S) genes. Negative and positive numbers represent the number of base pairs up and downstream of transcription start site (TSS; represented as 0). TES denotes the transcription end site. Number of tags within the region of interest for each gene was used for generating the box-plots in Figs. 2 and S3 as well as the bar-plots in Figure 3A-C

<sup>b</sup> The minimum number of tags required within a gene's region of interest in order to classify that gene as containing statistically significant levels of a given chromatin modification ( $p < 10^{-3}$ ). This was determined using Poisson probabilities, and was used to count the fraction of genes (within each set) containing a certain modification (as shown in Figure 3A-C).

**Table S2. Gene ontology analysis of 167 genes induced by TCR signaling (S→E subset).** Analysis for level 2 Biological Process terms was performed as described in Supplementary Methods- GO analysis. Total 9399 interrogated genes were used as a background.

| Term                                        | Genes | %    | P-Value  | Benjamini |
|---------------------------------------------|-------|------|----------|-----------|
| immune response                             | 18    | 10.8 | 1.10E-05 | 1.60E-03  |
| response to stress                          | 21    | 12.6 | 4.20E-04 | 3.10E-02  |
| response to chemical stimulus               | 15    | 9    | 6.10E-04 | 3.00E-02  |
| cell proliferation                          | 18    | 10.8 | 1.60E-03 | 5.60E-02  |
| response to external stimulus               | 15    | 9    | 2.80E-03 | 8.00E-02  |
| response to endogenous stimulus             | 10    | 6    | 3.70E-03 | 8.70E-02  |
| behavior                                    | 10    | 6    | 7.00E-03 | 1.40E-01  |
| cell cycle process                          | 13    | 7.8  | 1.50E-02 | 2.50E-01  |
| cell cycle                                  | 14    | 8.4  | 2.10E-02 | 3.00E-01  |
| somatic diversification of immune receptors | 3     | 1.8  | 2.40E-02 | 3.00E-01  |
| cell division                               | 6     | 3.6  | 2.40E-02 | 2.80E-01  |
| immune system development                   | 6     | 3.6  | 3.00E-02 | 3.20E-01  |
| defense response                            | 11    | 6.6  | 4.40E-02 | 4.00E-01  |
| regulation of metabolic process             | 34    | 20.4 | 5.80E-02 | 4.70E-01  |
| macromolecule metabolic process             | 67    | 40.1 | 6.30E-02 | 4.80E-01  |
| regulation of cellular process              | 46    | 27.5 | 6.90E-02 | 4.90E-01  |
| leukocyte activation                        | 5     | 3    | 7.60E-02 | 5.00E-01  |
| cytokine production                         | 4     | 2.4  | 8.90E-02 | 5.40E-01  |

**Table S3. miRNA expression and promoter identification.**

Table shows number of sequencing tags mapped to **miR** or **miR\*** and predicted promoters. Table is provided as a separate Excel file. See key and summary sheets within the Excel document for details.

**Table S4. Statistical analysis of tag density in gene subsets.** Table shows p-values obtained using two-tailed Wilcoxon rank-sum test comparing pairwise median tag numbers of two gene sets. Table is provided as a separate Excel file.

**Table S5. Gene ontology analysis of Pol II poised genes.** 1,143 silent genes possessing RNA polymerase II at their promoters were analyzed. Analysis for level 2 GO biological process terms was performed as described in Supplementary Methods- GO analysis. Total of 5484 silent genes were used as a background.

| Term                                           | Genes | %    | P-Value  | Benjamini |
|------------------------------------------------|-------|------|----------|-----------|
| primary metabolic process                      | 389   | 35   | 3.60E-23 | 5.20E-21  |
| cellular metabolic process                     | 381   | 34.2 | 2.40E-21 | 1.70E-19  |
| macromolecule metabolic process                | 338   | 30.4 | 3.10E-21 | 1.50E-19  |
| regulation of cellular process                 | 226   | 20.3 | 7.80E-08 | 2.80E-06  |
| transcription                                  | 148   | 13.3 | 1.30E-07 | 3.80E-06  |
| regulation of metabolic process                | 163   | 14.6 | 2.20E-07 | 5.20E-06  |
| cellular component organization and biogenesis | 144   | 12.9 | 3.00E-07 | 6.20E-06  |
| regulation of gene expression                  | 146   | 13.1 | 2.70E-06 | 4.80E-05  |
| regulation of biological process               | 236   | 21.2 | 3.00E-06 | 4.90E-05  |
| cell cycle                                     | 44    | 4    | 3.10E-04 | 4.50E-03  |
| macromolecule localization                     | 37    | 3.3  | 8.70E-04 | 1.10E-02  |
| response to endogenous stimulus                | 23    | 2.1  | 1.20E-03 | 1.40E-02  |
| cell division                                  | 13    | 1.2  | 1.40E-03 | 1.60E-02  |
| cell cycle process                             | 38    | 3.4  | 2.00E-03 | 2.00E-02  |
| establishment of protein localization          | 32    | 2.9  | 3.30E-03 | 3.10E-02  |
| establishment of cellular localization         | 38    | 3.4  | 2.60E-02 | 2.10E-01  |
| cellular localization                          | 39    | 3.5  | 3.40E-02 | 2.50E-01  |
| ensheathment of neurons                        | 5     | 0.4  | 4.70E-02 | 3.20E-01  |
| response to abiotic stimulus                   | 16    | 1.4  | 6.40E-02 | 3.90E-01  |
| RNA processing                                 | 12    | 1.1  | 7.70E-02 | 4.40E-01  |

**Table S6. Primers used in 5'RACE experiment.**

| miRNA         | RT primer                   | Nested primer               |
|---------------|-----------------------------|-----------------------------|
| hsa-mir-146b  | AGCCTATGGAATTCAGTTCTCAGTG   | GGAGGAGAAAGAGTTCCTGAAGCACA  |
| hsa-mir-132   | AGTAACAATCGAAAGCCACGGTTGC   | AACAATCGAAAGCCACGGTTGCCCT   |
| hsa-mir-24-2  |                             |                             |
| hsa-mir-23a   |                             |                             |
| hsa-mir-27a   | TGCTCACAAGCAGCTAAGCCCTGCT   | CCAGAGGCTGGCACCTGGAGGGGAGAA |
| hsa-mir-150   | CACTGGTACAAGGGTTGGGAGACAG   | RT primer was used in PCR   |
| hsa-mir-125a  | TCACAGGTTAAAGGGTCTCAGGGACCT | GGGGGTGGGGTGGGGGTGGTTTGAGAA |
| hsa-mir-99b   |                             |                             |
| hsa-let-7e    |                             |                             |
| hsa-mir-148a  | AGTCGGAGTGTCTCAGAACTTTGCC   | CCGCTCCGCTCCCTTCCATCTTGACTT |
| hsa-mir-363   | AAATTGCATCGTGATCCACCCGACA   | TTTCGCCCTTGCCAGGCGCCCTCTCA  |
| hsa-mir-20b   |                             |                             |
| hsa-mir-19b-2 |                             |                             |
| hsa-mir-106a  |                             |                             |
| hsa-mir-92a-2 |                             |                             |
| hsa-mir-18b   |                             |                             |

**Table S7. Primers used for cloning miRNA promoters into pGL3 Enhancer vector.**

|                  |                                      |
|------------------|--------------------------------------|
| 3'Bgl-con1       | CTGCAAGATCTTATGCATGTTGGGGAAGACA      |
| 3'Bgl-con2       | CTGCAAGATCTACTCCCAGGCCCTACGTAAT      |
| 3'Bgl-mir-122    | CTGCAAGATCTAATGTCCCCTACCTGCACAC      |
| 3'Bgl-mir-187    | CTGCAAGATCTCACTGGGTCCCCCTCCTG        |
| 3'Bgl-mir-199a-2 | CTGCAAGATCTTTGGCATGTGGCATTACTT       |
| 3'Bgl-mir-422a   | CTGCAAGATCTCTCAGTCTTTGGAGCCAGGT      |
| 3'Bgl-mir-647    | CTGCAAGATCTTCTGTCTTTGAAGGTGGCATC     |
| 3'Bgl-mir-760    | CTGCAAGATCTATCCTCCGAGAGCTCGTCTT      |
| 5'Kpn-con1       | CACGTGGTACCCACCTGTGTGCCATGTATCC      |
| 5'Kpn-con2       | CACGTGGTACCTCATATGCCACCCATCAAGA      |
| 5'Kpn-mir-122    | CACGTGGTACCACTCCTGGGTAGGGCCTAAG      |
| 5'Kpn-mir-187    | CACGTGGTACCGGAGCCCAGCCAGATTGTAT      |
| 5'Kpn-mir-199a-2 | CACGTGGTACCGGTAGTGTAATCTTTCAGGGAATTG |
| 5'Kpn-mir-422a   | CACGTGGTACCGTTGCACTCGGAATGTGGTT      |
| 5'Kpn-mir-647    | CACGTGGTACCCCTGCAGGCCCTTTTGTTTA      |
| 5'Kpn-mir-760    | CACGTGGTACCCACTGGACTCTTCCCAGGAC      |

## Supplementary Figure Legends

**Figure S1. Purification and activation of CD4<sup>+</sup> T cells.** (A) CD4<sup>+</sup> T cells were purified by negative selection to 95-98% purity. (B) T cells were incubated with anti-CD3/28 beads for 18 hours, which resulted in 85-95% activation as indicated by the percentage of CD25-positive cells. (C) Box plot shows the distribution of gene expression values (log<sub>2</sub> scale) in resting and activated T cells for each of the four gene sets. Expression was defined as probe-set intensity divided by sample median intensity. The data points for each gene set were divided into quartiles, and the interquartile range (IQR) is calculated as the difference between the first and the third quartiles. The filled box denotes the middle 50% of the data points, with the horizontal line in between and the notch representing the median and confidence intervals, respectively. Data points more than 1.5 times IQR lower or higher than first or third quartiles, respectively represent outliers and are shown as dots. The horizontal line that is connected by vertical dashed lines, above and below the filled box (whiskers), represents the largest and the smallest non-outlier data points.

**Figure S2. Examples of genes whose chromatin status does not change upon induction.** Leukemia Inhibitory Factor (*LIF*) (A) and Cytokine Induced SH2-containing Protein (*CISH*) (B) genes are not expressed in resting T cells, but are induced upon T cell activation. Active chromatin modifications are present at the promoter and in the gene body even when these genes are silent in resting cells.



**Figure S3. ChIP-Seq tag density profiles for expression-based gene sets in resting and activated T cells.** Gene sets: S→E (Silent in resting and Expressed in activated T cells), red broken line; E→S, blue broken line; E→E, red line; S→S, blue line. (A) H2A.Z, (B) H3K4me1, (C) H3K9me1, (D) H3K27me1, (E) H3K36me3, (F) H4K20me1, (G) Pol II. Box-plot summarizes the distribution of the number of tags in the region of interest (highlighted in yellow) for each gene set. The average tag density values for resting and activated cells are not directly comparable as they have not been normalized across samples. Box-plot captures the median, the middle 50% of the data points, and the outliers. The data points for each gene set is divided into quartiles, and the interquartile range (IQR) is calculated as the difference between the first and the third quartiles. The filled box denotes the middle 50% of the data points, with the horizontal line in between and the notch representing the median and confidence intervals, respectively. Data points more than 1.5 times IQR lower or higher than first or third quartiles, respectively represent outliers and are shown as dots. The horizontal line that is connected by vertical dashed lines above and below the filled box (whiskers) represents the largest and the smallest nonoutlier data points. The cluster of horizontal red and black lines below each box-plot signifies whether or not the difference between the medians of two gene sets are statistically significant, respectively ( $p < 0.01$ ; two-tailed Wilcoxon rank-sum test).

**Figure S4. ChIP-Seq tag density profiles for expression-based gene sets in resting T cells.** Gene sets: S→E (Silent in resting and Expressed in activated T cells), red broken line; E→S, blue broken line; E→E, red line; S→S, blue line. (A) H2BK5ac, (B) H2BK12ac, (C) H2BK20ac, (D) H2BK120ac, (E) H3K4ac, (F) H3K4me2, (G) H3K9ac,

(H) H3K18ac, (I) H3K23ac, (J) H3K27ac, (K) H3K36ac, (L) H4K5ac, (M) H4K8ac, (N) H4K12ac, (O) H4K91ac, (P) H2AK9ac, (R) H2BK5me1, (S) H4K16ac.

**Figure S5. Comparison of PolII levels in the gene body.**

Pol II tag density profile is shown on the left. Box-plot (center) summarizes the distribution of the number of tags in the region of interest (highlighted in yellow) for each gene set. See Fig. S3 legend for box-plot description. The cluster of horizontal red and black lines below each box-plot signifies whether or not the difference between the medians of two gene sets are statistically significant, respectively ( $p < 0.01$ ; two-tailed Wilcoxon rank-sum test). Table on the right indicates actual p-values. Significant values are shown in bold.

**Figure S6. Accuracy of promoters predicted using chromatin modification patterns.**

The promoter prediction algorithm (See SI Methods) was used to predict transcription start sites for 1000 highly expressed genes in resting T cells. Frequency distribution (A) and cumulative distribution (B) of predicted transcription start sites relative to the annotated start site is shown.

**Figure S7. 5'RACE experiment.**

(A) Experimental approach. Pri-miRNA was reverse transcribed using RT primer. After reaching the end of template MMLV Reverse Transcriptase adds several C nucleotides and switches template to Smart oligo (Clontech). Resulting cDNA is amplified by PCR with Universal primer and either RT primer or nested primer. (B) Table shows seven

clusters of miRNAs (16 miRNAs) located within 5 kb of their putative promoter. miRNAs transcribed from the same TSSs are shown by color. Columns show distance from miRNA to predicted TSS, expected and obtained PCR amplicon size. (C) Agarose gel analysis of PCR fragments obtained in 5'RACE experiment. Colors were inverted and contrast adjusted for the whole picture for printing.

**Figure S8. A majority of intragenic miRNAs share promoters with their host genes.**

Chromatin modification patterns in the region surrounding the intragenic *MIR185* (A), and *MIR101-2* (B) are shown. Potential promoter regions are marked by H3K4me3, H2A.Z and Pol II peaks. The green bars extend from the predicted transcription start site to the 3' end of the pre-miRNA.

**Figure S9. ChIP-Seq tag density profiles near predicted TSSs of miRNA genes.**

Modification patterns near all, intra- and intergenic miRNA promoters are shown in resting T cells. (A) H2A.Z, (B) H3K4me3, (C) Pol II, (D) H3K4me1, (E) H3K4me2, (F) H4K9ac, (G) H3K9me1, (H) H3K14ac, (I) H3K27ac, (J) H4K20me1, (K) H3K36me3. While H3K4me3, H2A.Z and Pol II were used for promoter prediction and thus one can expect to see their peaks at the promoters, the rest of modifications were enriched at promoters independently of the prediction algorithm. Due to miRNA TSS being determined imprecisely, we are not able to resolve two peaks that we see surrounding TSS of “usual” genes in the case of miRNA genes.

**Figure S10. Examples of inducible miRNA genes that are poised for expression. (A)**

*MIR147B* expression increased from 1 read in resting T cells to 10 in activated. (B)

*MIR7-1* expression increased from 169 reads in resting T cells to 2206 in activated.

**Figure S11. Use of more stringent gene-set definition does not influence results.**

Alternative gene sets were defined as described in Methods. Panels show tag density profiles in resting (top) and activated (bottom) cells for (A) H2A.Z, (B) H3K4me3, (C) Pol II, (D) H3K36me3, (E) H3K79me2, (F) H3K27me3. Gene sets: S→E (Silent in resting and Expressed in activated T cells), red broken line; E→S, blue broken line; E→E, red line; S→S, blue line.

## Supplementary Figures

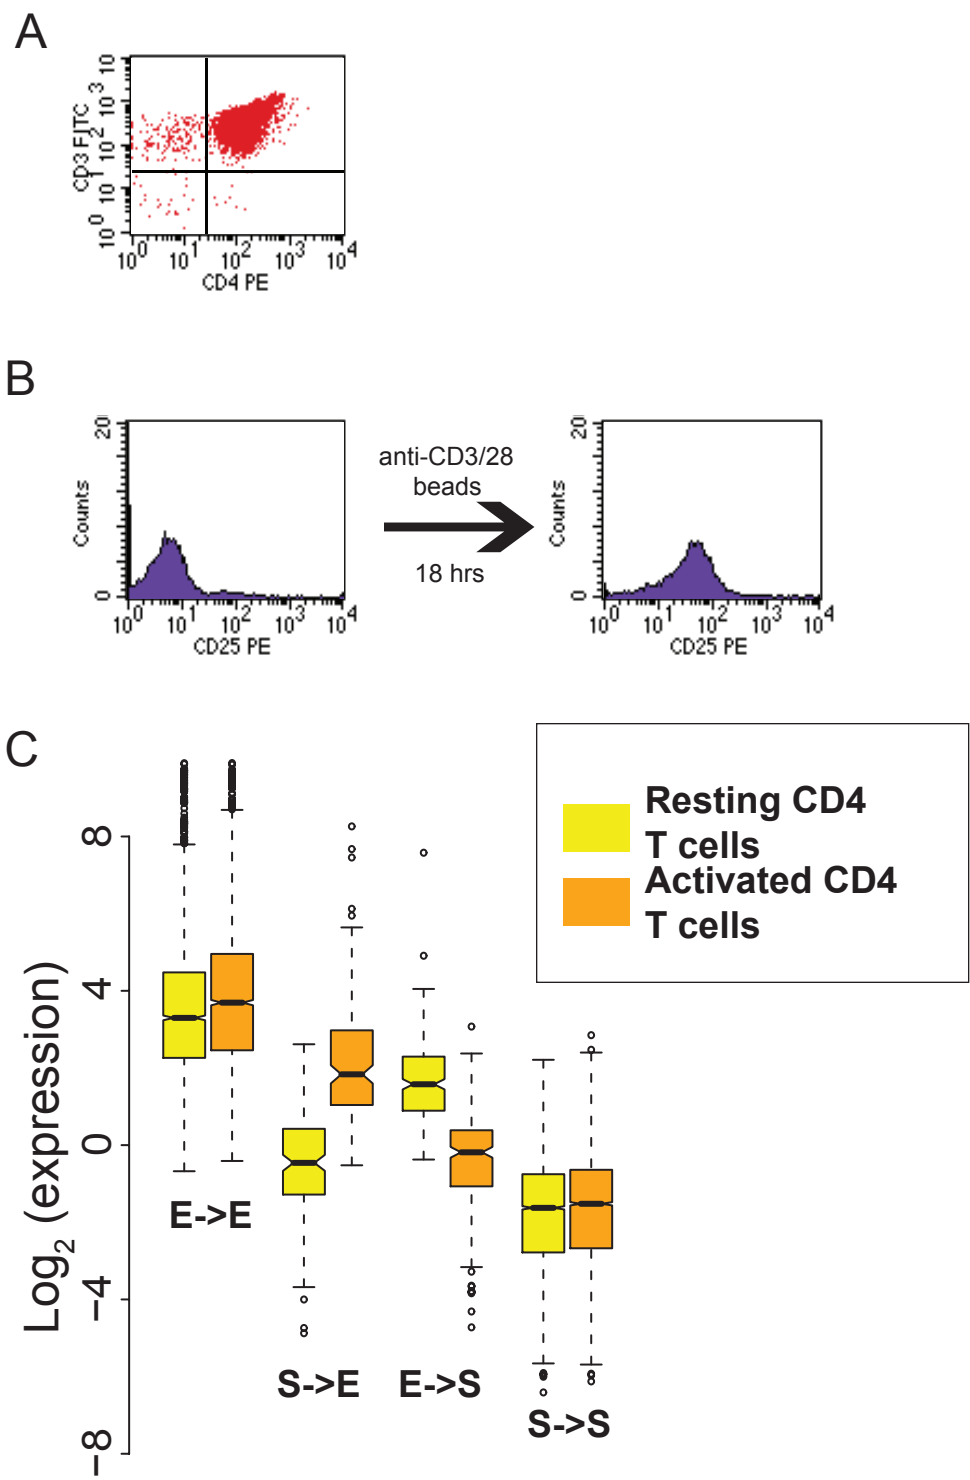

**A**

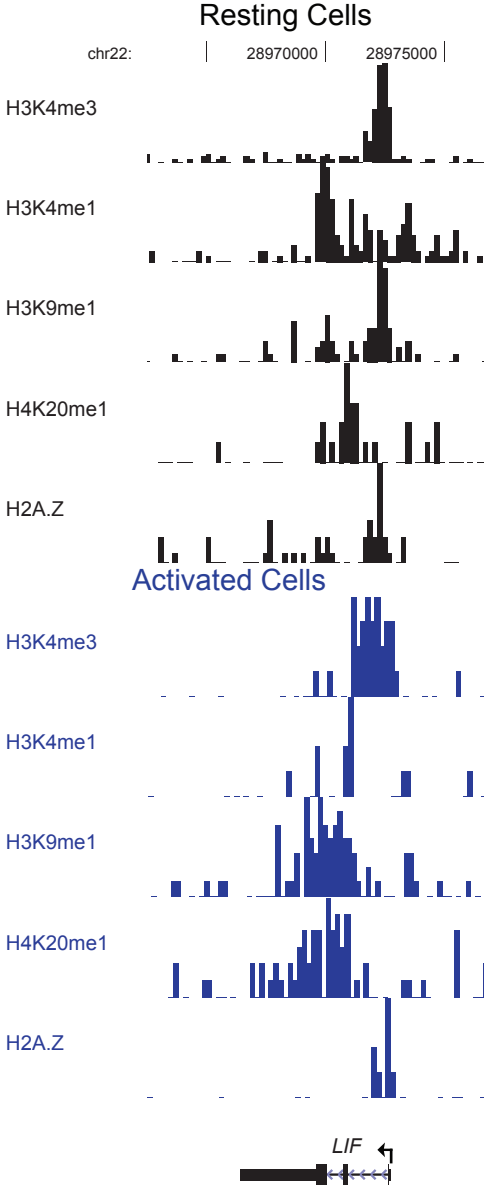

**B**

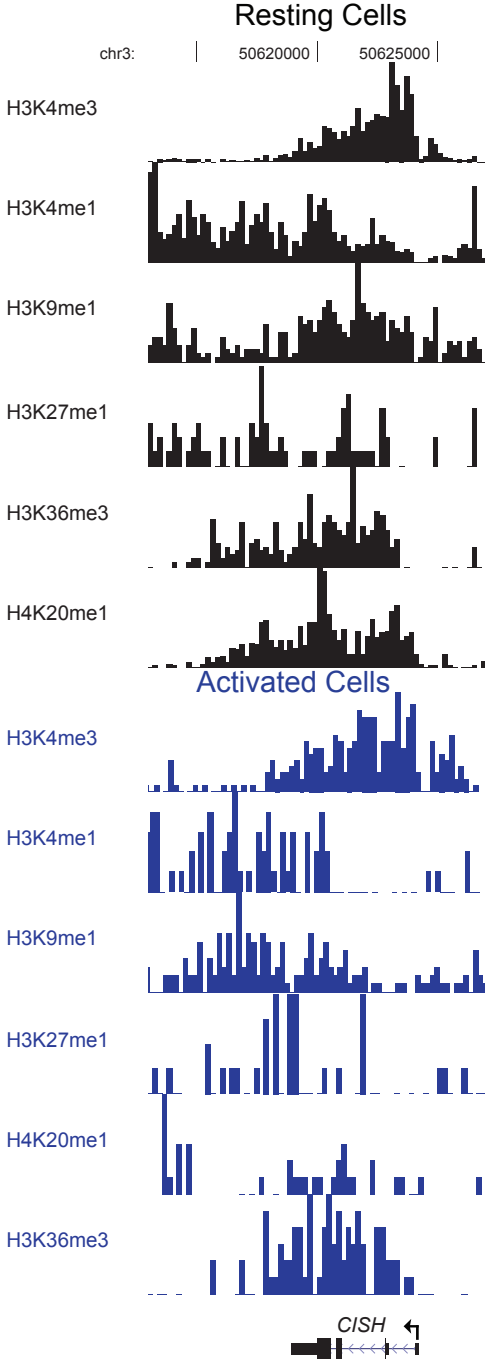

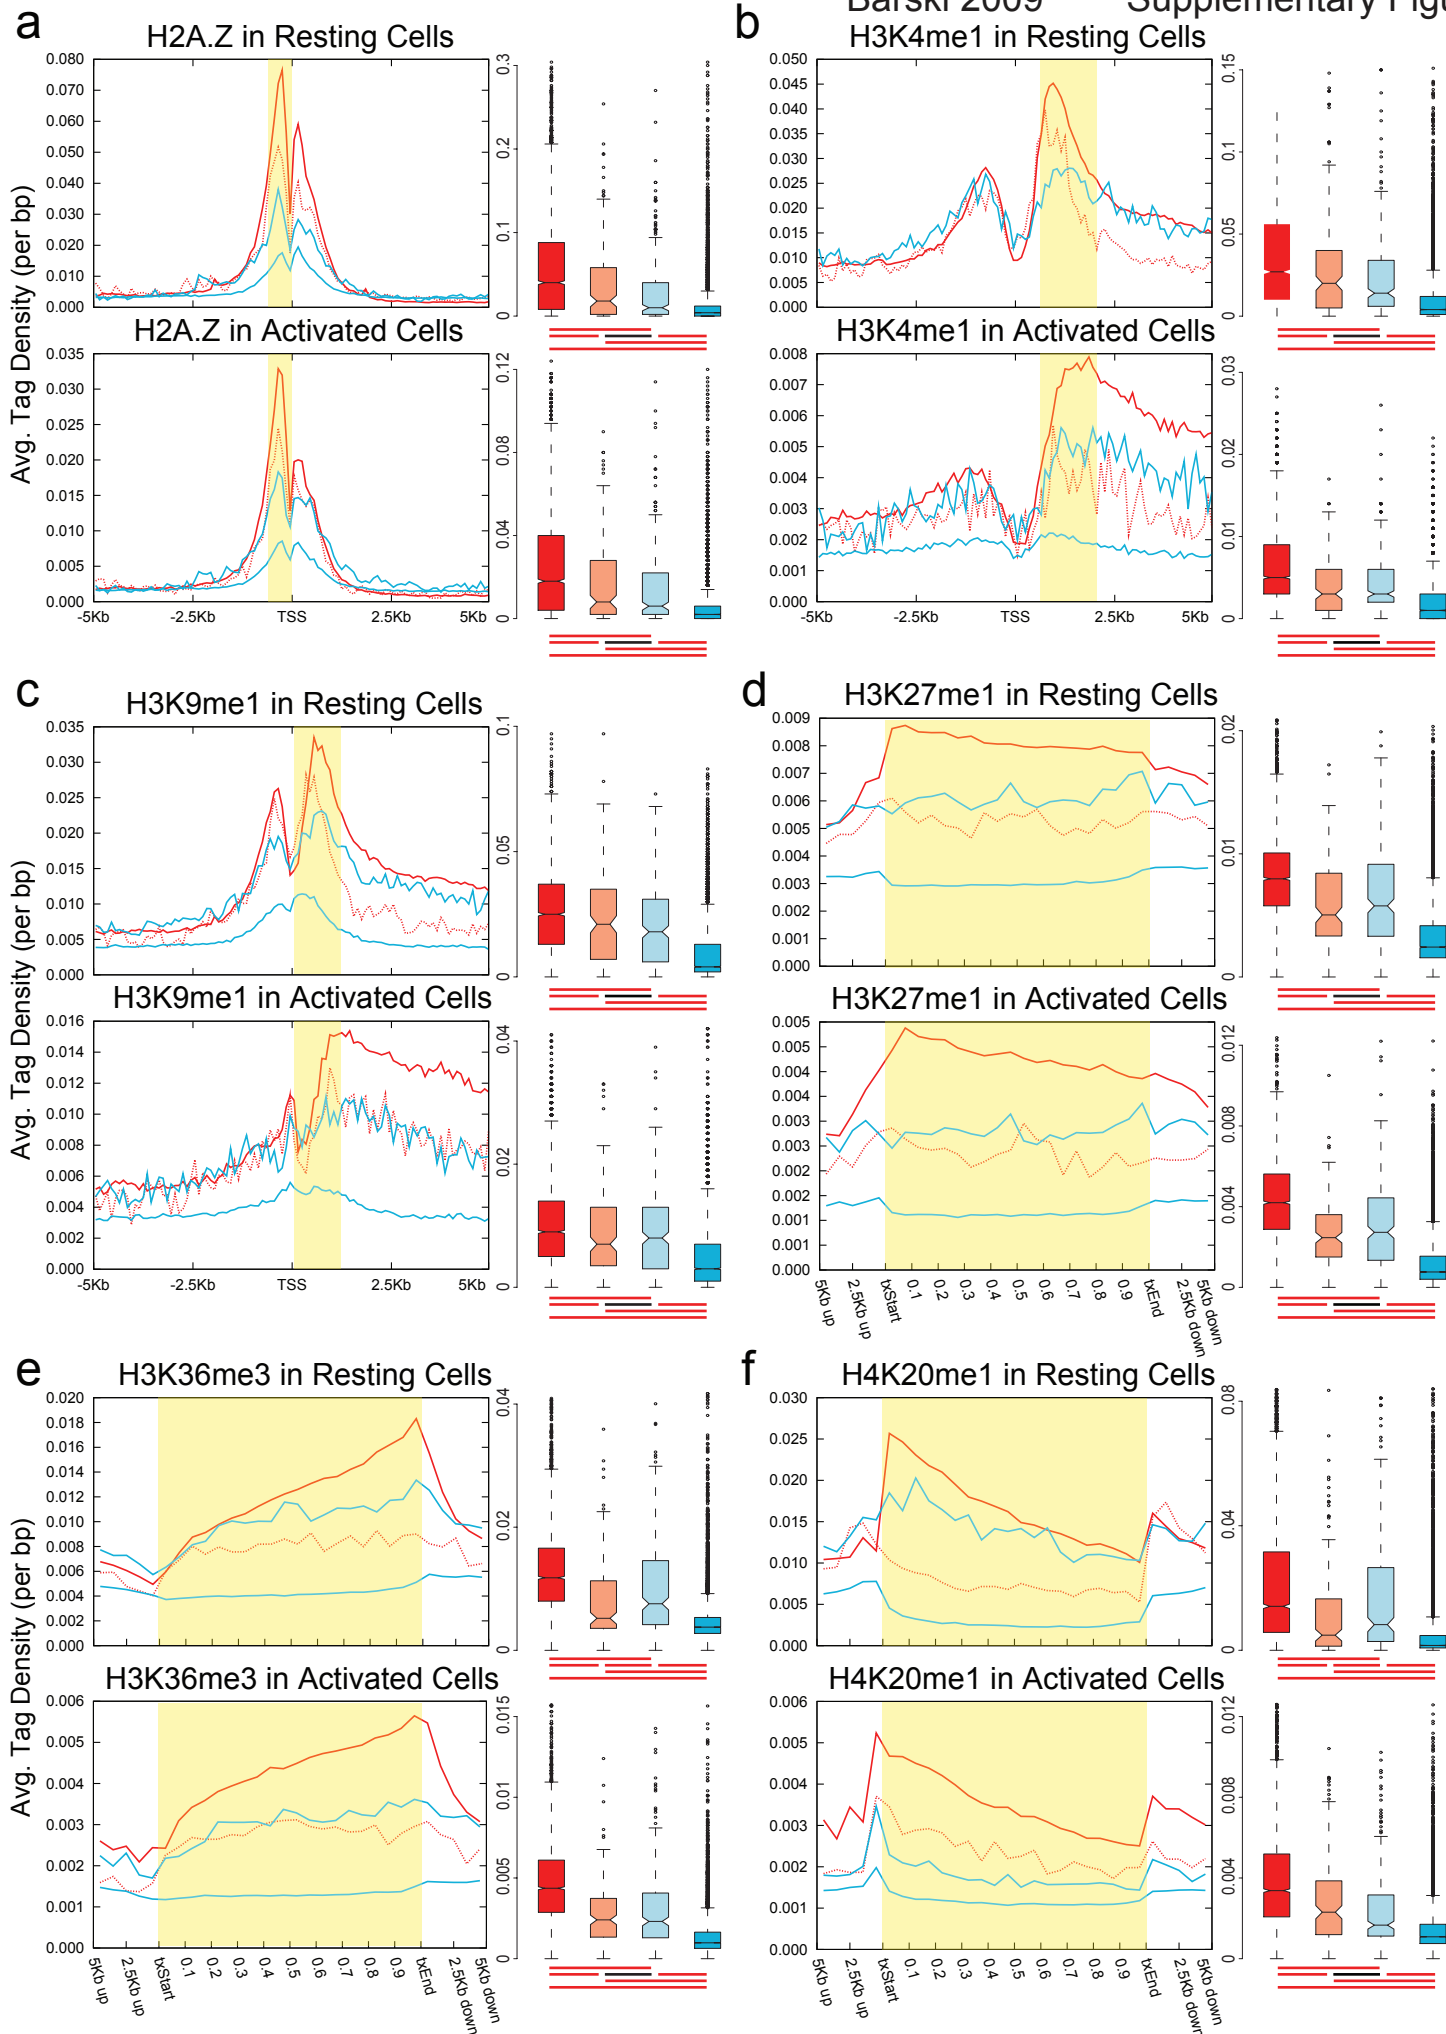

Barski 2009 Supplementary Figure 4

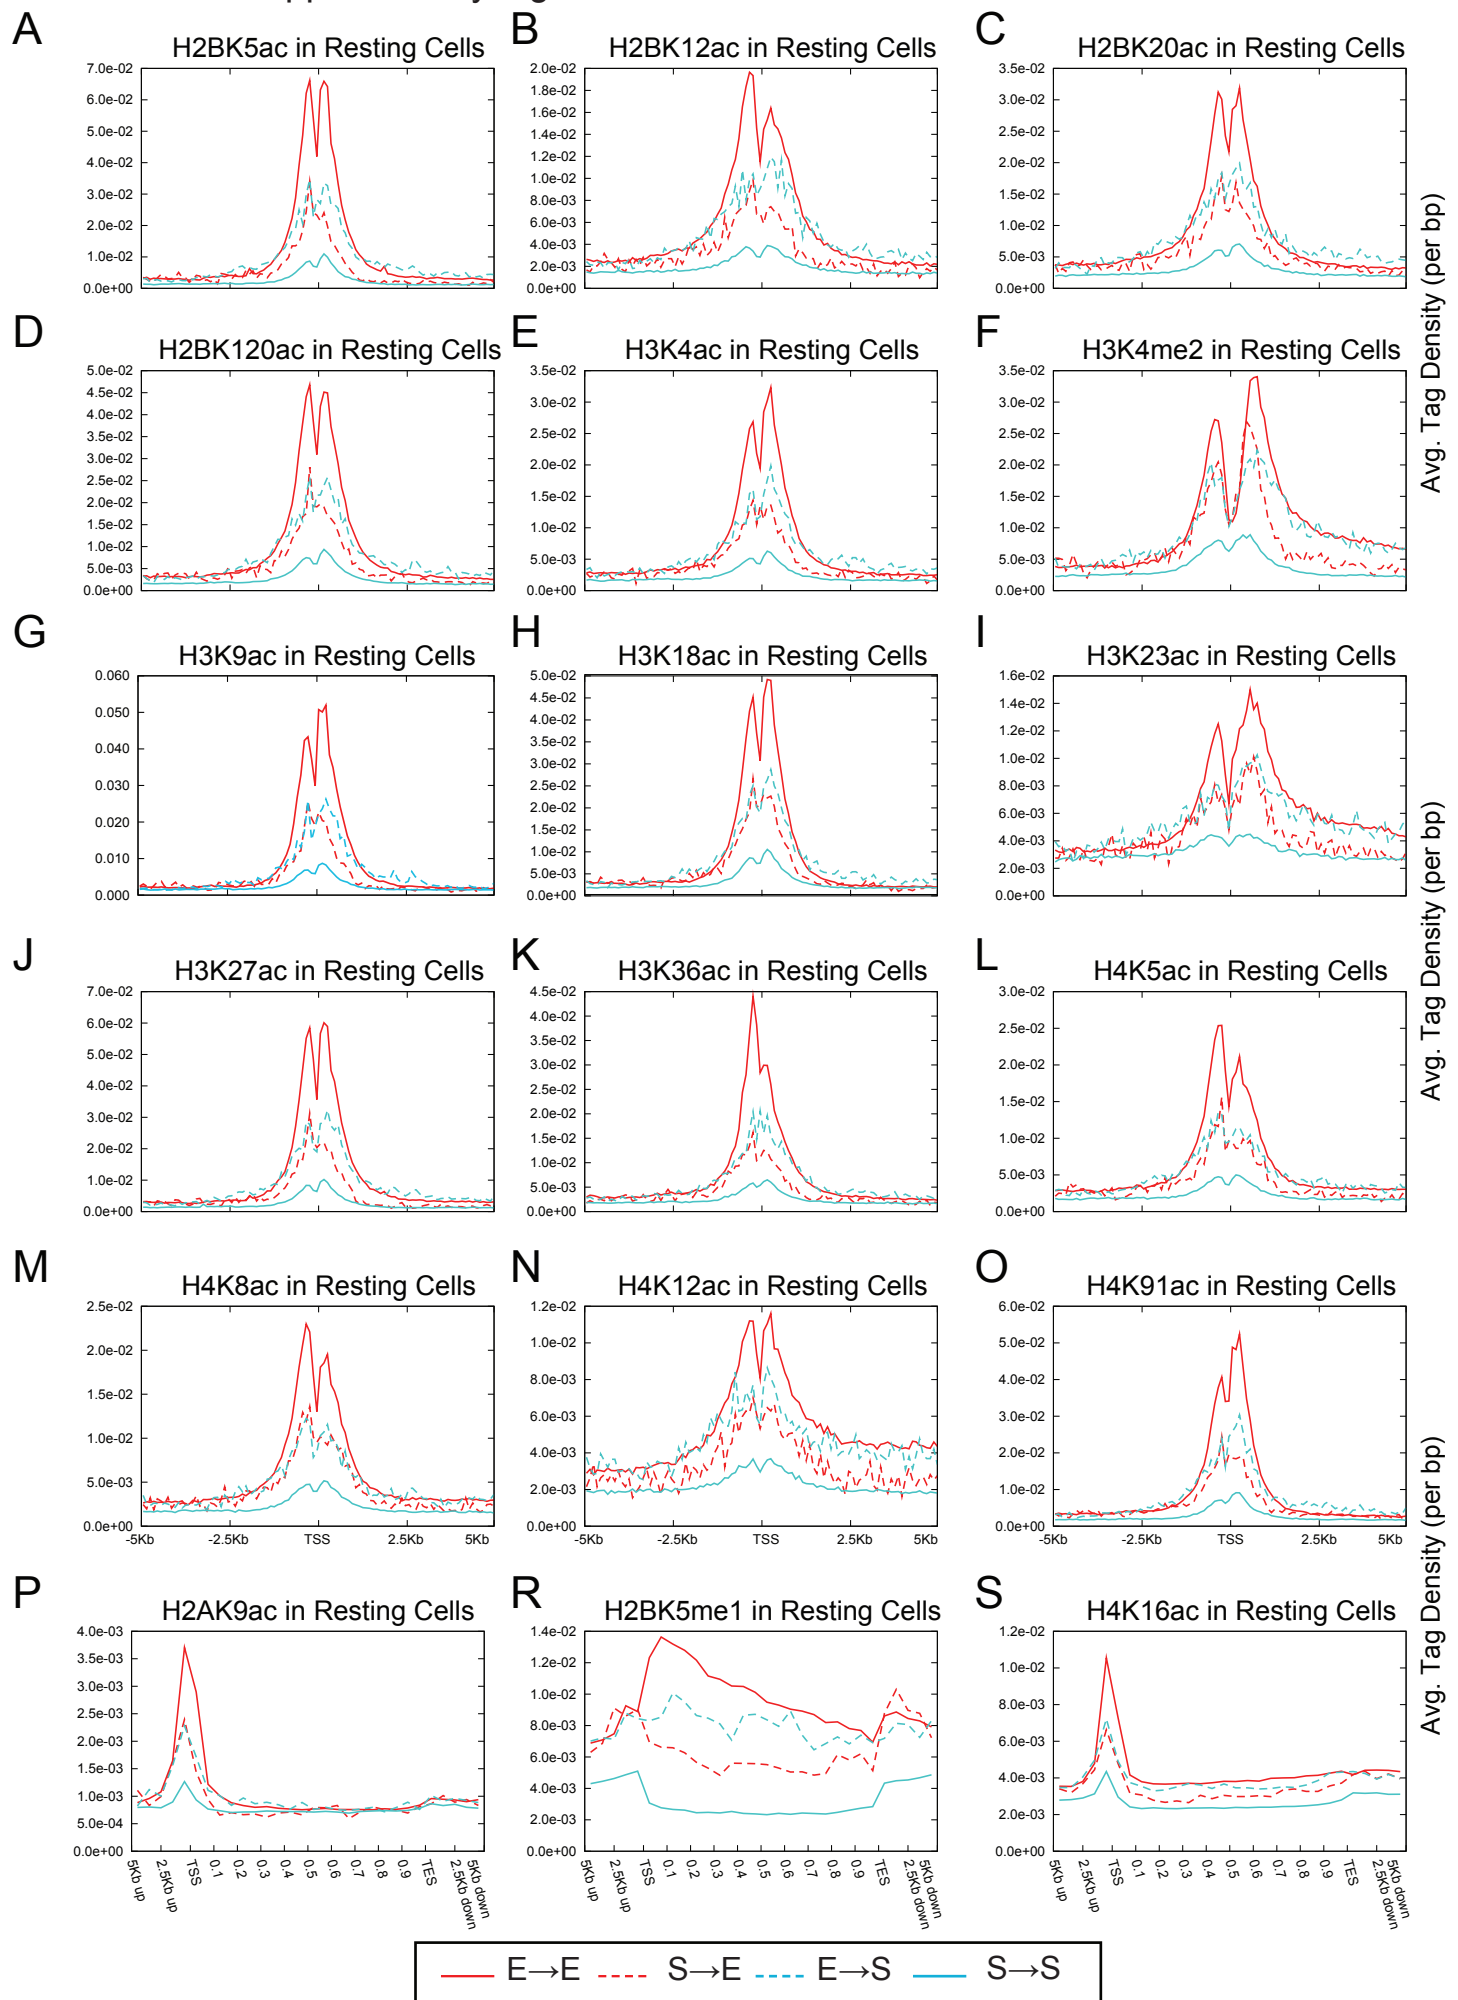



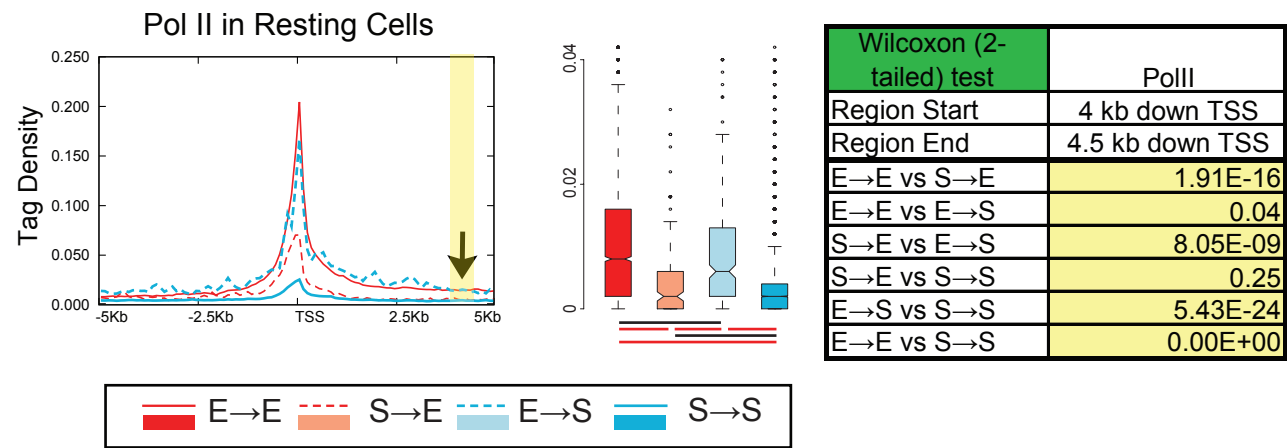

Barski 2009 Supplementary Figure 6

**A**

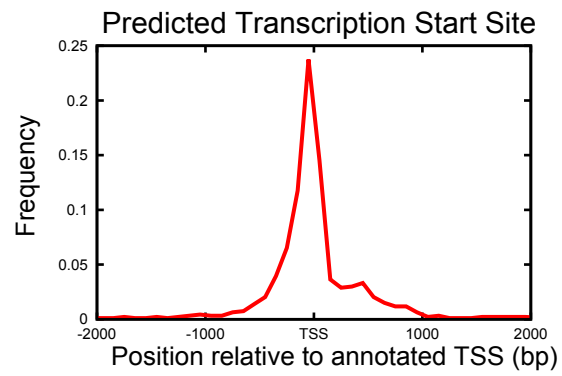

**B**

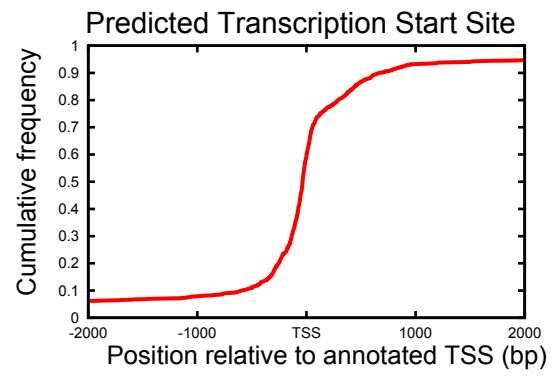

**A**

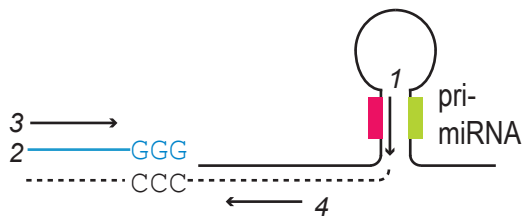

- 1 Reverse transcription primer  
2 Smart Oligo  
3 Universal primer  
4 Nested primer

**B**

| miRNA         | Distance* | Amplicon size |               |
|---------------|-----------|---------------|---------------|
|               |           | Expected      | Obtained**    |
| hsa-mir-363   | 3746      | 226           | 320           |
| hsa-mir-20b   | 3321      |               |               |
| hsa-mir-19b-2 | 3432      |               |               |
| hsa-mir-106a  | 2920      |               |               |
| hsa-mir-92a-2 | 3586      |               |               |
| hsa-mir-18b   | 3087      |               |               |
| hsa-mir-148a  | 1354      | 252           | 270           |
| hsa-mir-125a  | 2336      | 278           | 300           |
| hsa-mir-99b   | 1694      |               |               |
| hsa-let-7e    | 1868      |               |               |
| hsa-mir-150   | 160       | 242           | 330           |
| hsa-mir-27a   | 386       | 256           | 300, 450, 500 |
| hsa-mir-23a   | 244       |               |               |
| hsa-mir-24-2  | 544       |               |               |
| hsa-mir-132   | 148       | 245           | 190           |
| hsa-mir-146b  | 695       | 222           | 180           |

\* Distance between predicted TSS and pre-miRNA.

\*\* Estimate

**C**

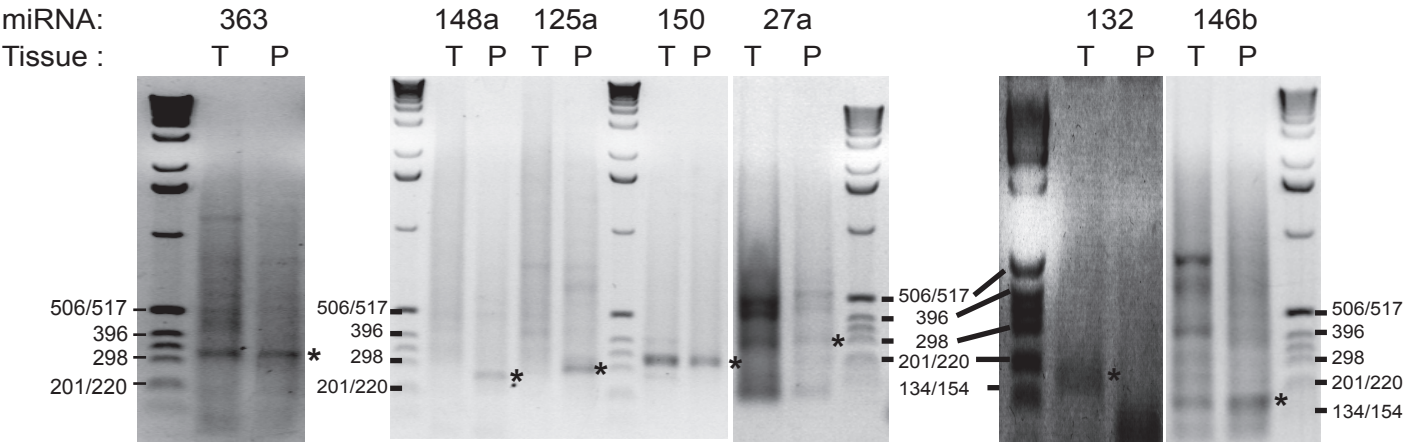

P= placenta, T = CD4 T cells (resting and activated)

Barski 2009 Supplementary Figure 8

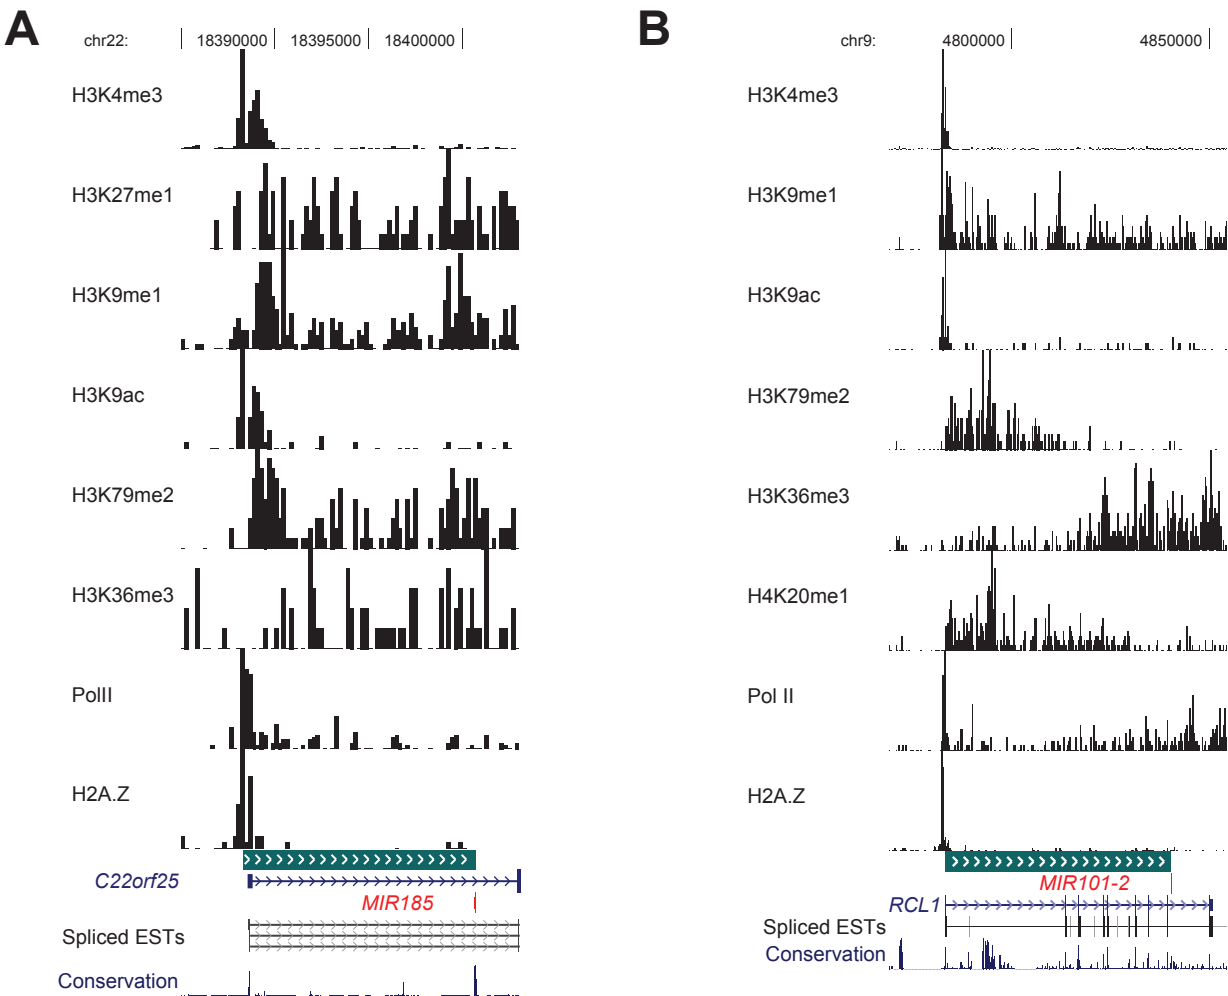

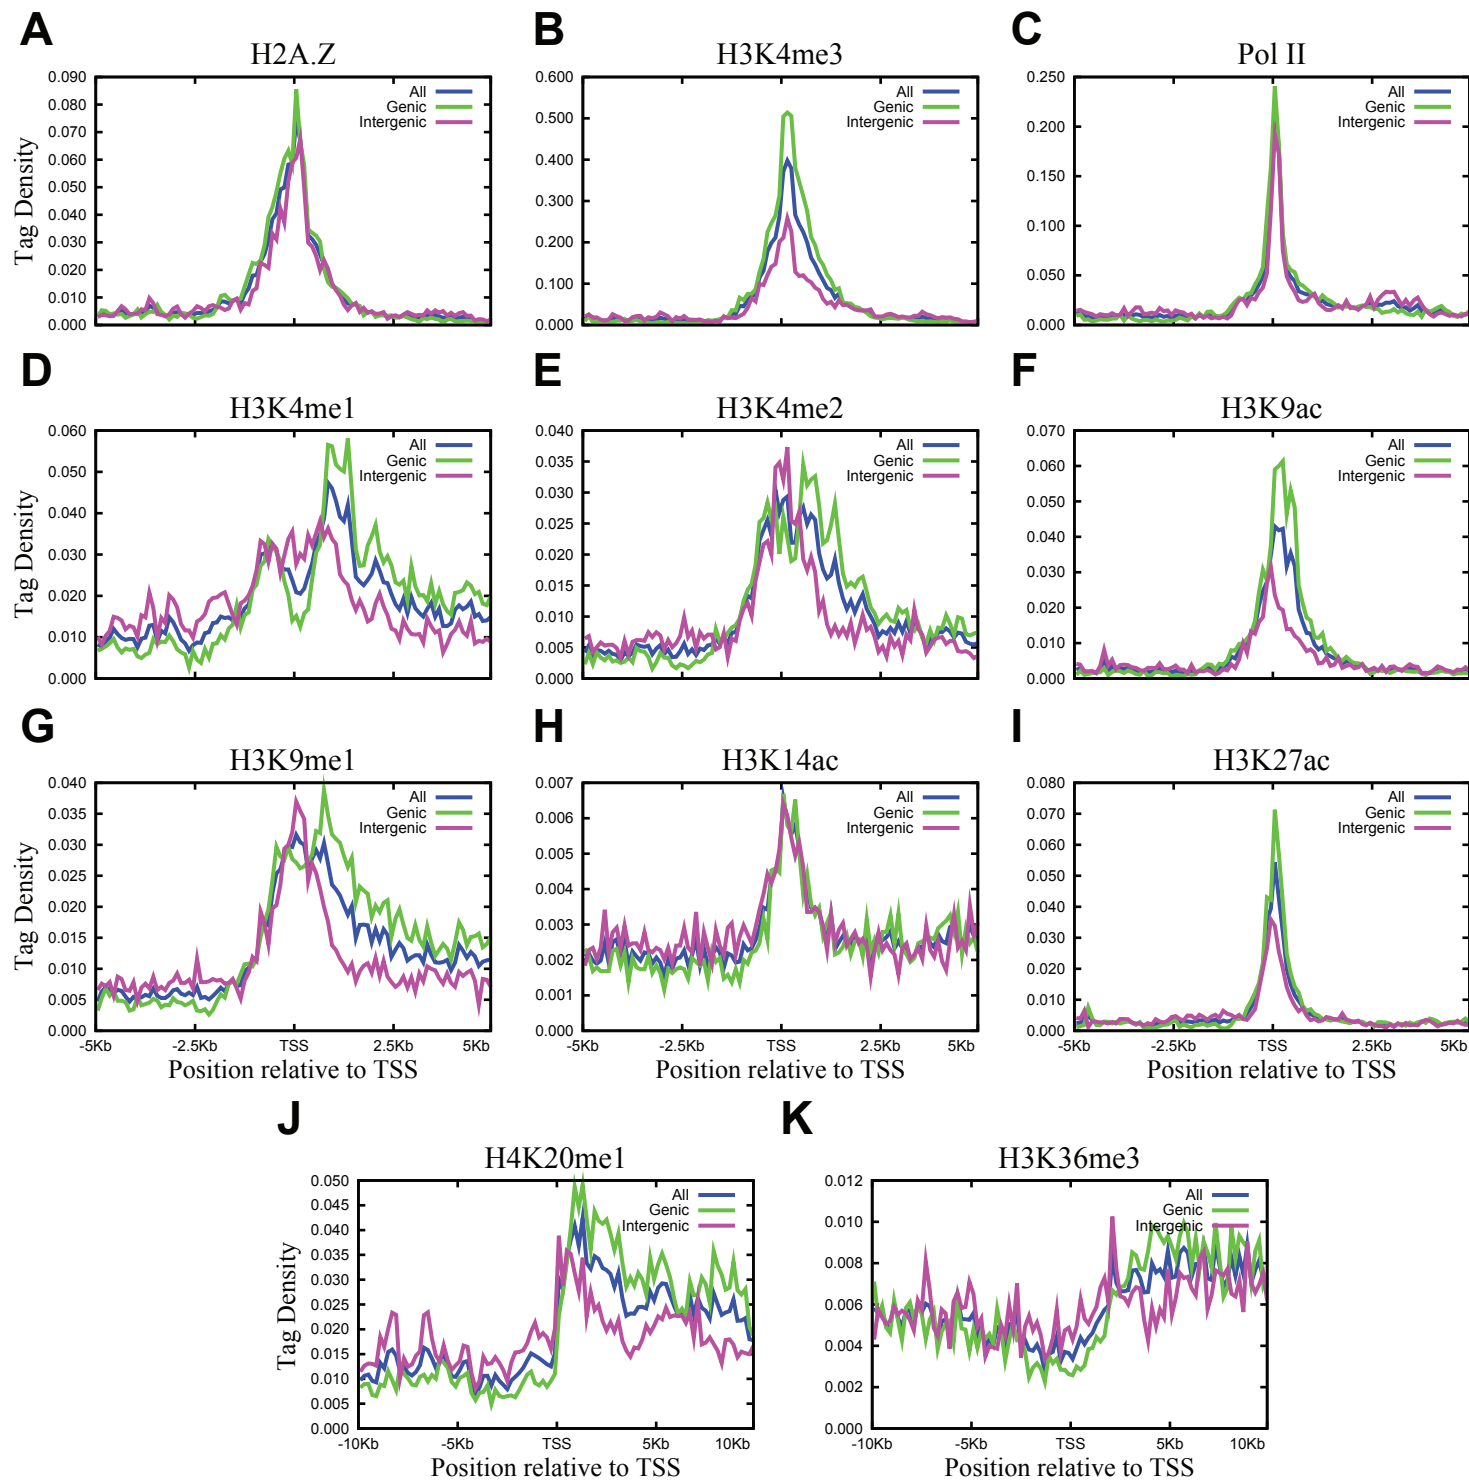

A

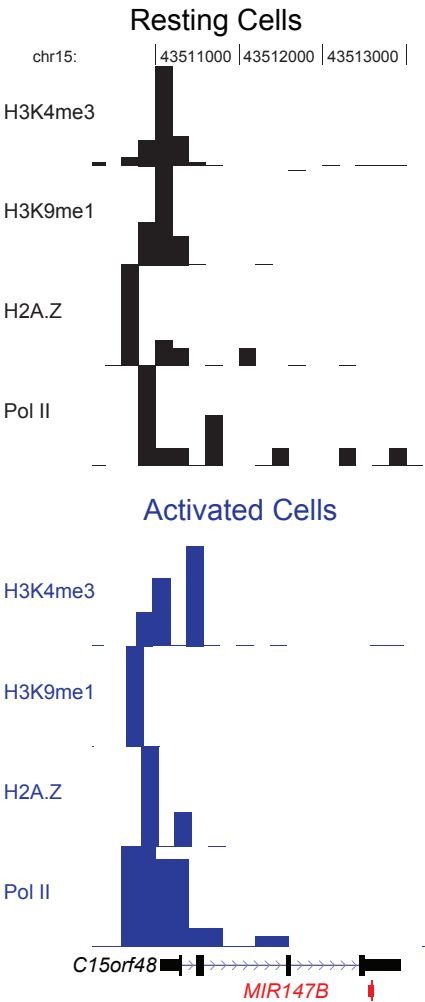

B

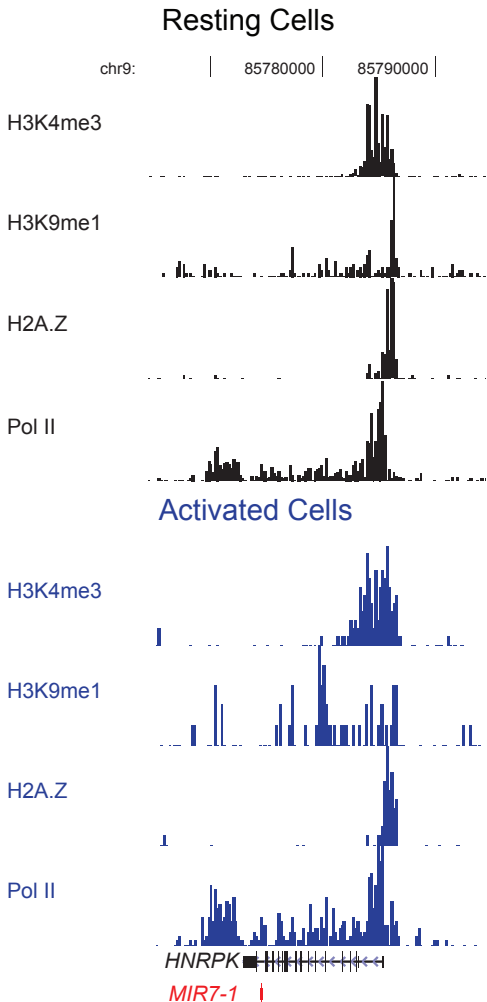

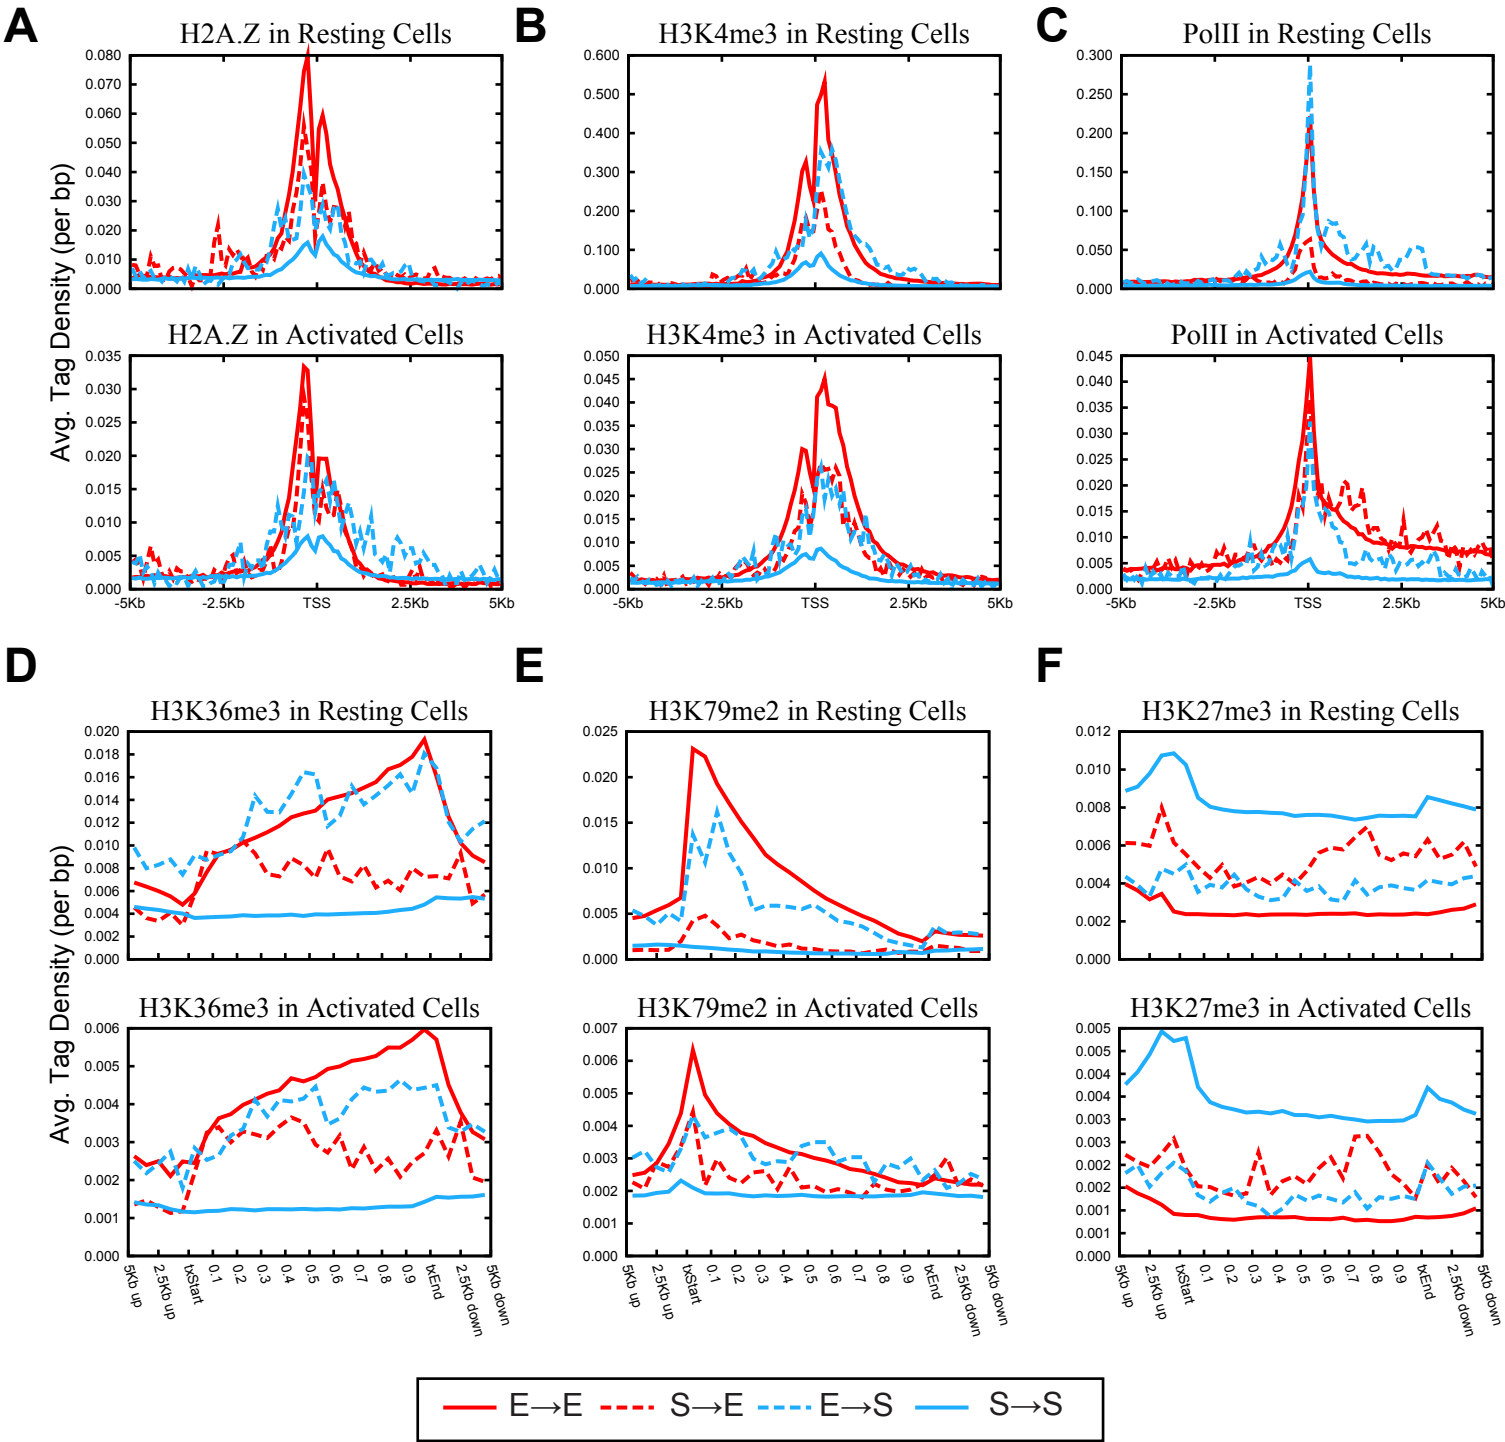

Supplement: Barski_2009_090951_SI_complete.pdf [file Barski_2009_090951_SI_complete.pdf]
